# Supplementary material for: A low-cost monitor for simultaneous measurement of fine particulate matter and aerosol optical depth – Part 3: Automation and design improvements
Source: Copernicus journal article supplement (doi:10.5194/amt-2021-73), 2021-04-01
Supplement: Supplementary file 1 [file amt-2021-73-supplement-version3.zip]

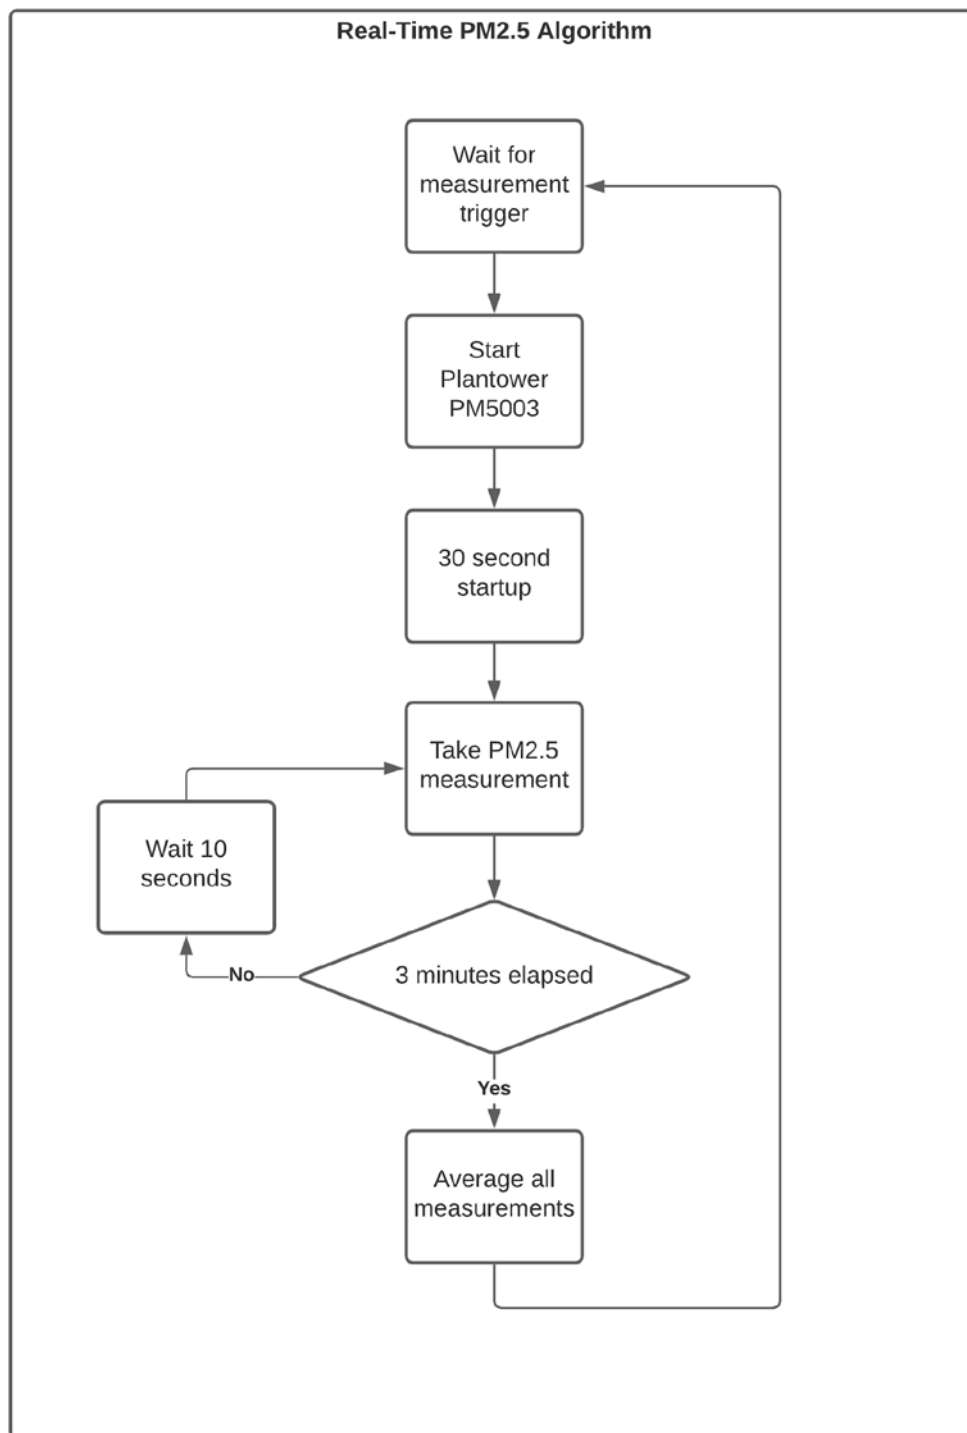

**Figure S1:** Overview of real-time PM<sub>2.5</sub> measurement protocol.

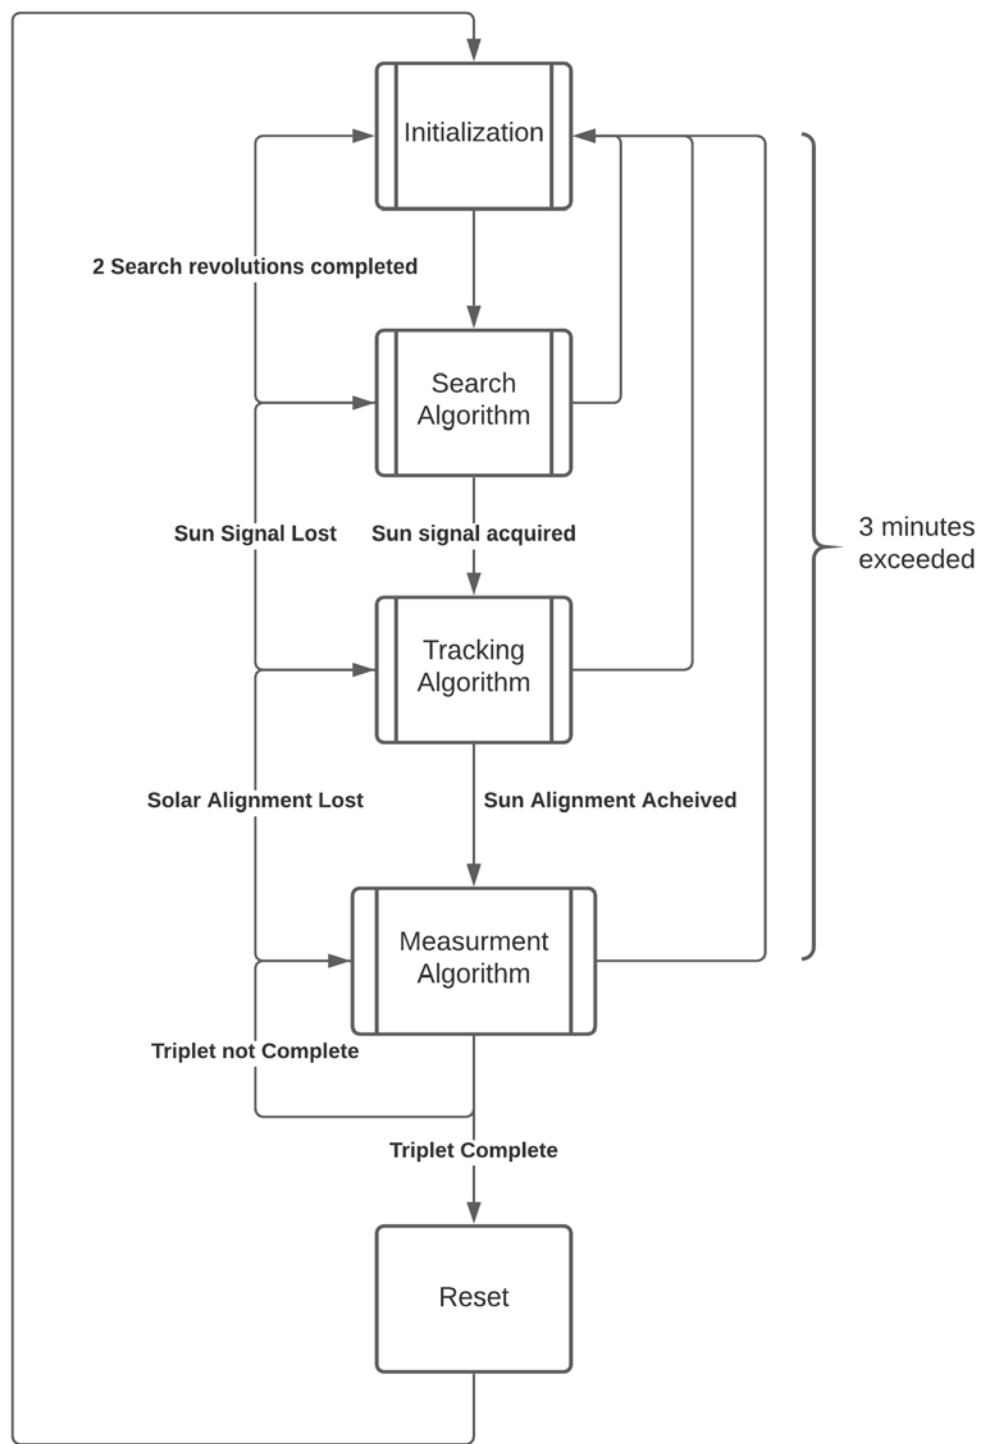

**Figure S2:** Overview of AOD measurement protocol. Initialization, search, tracking, and measurement algorithms are detailed in figures S2-S5.

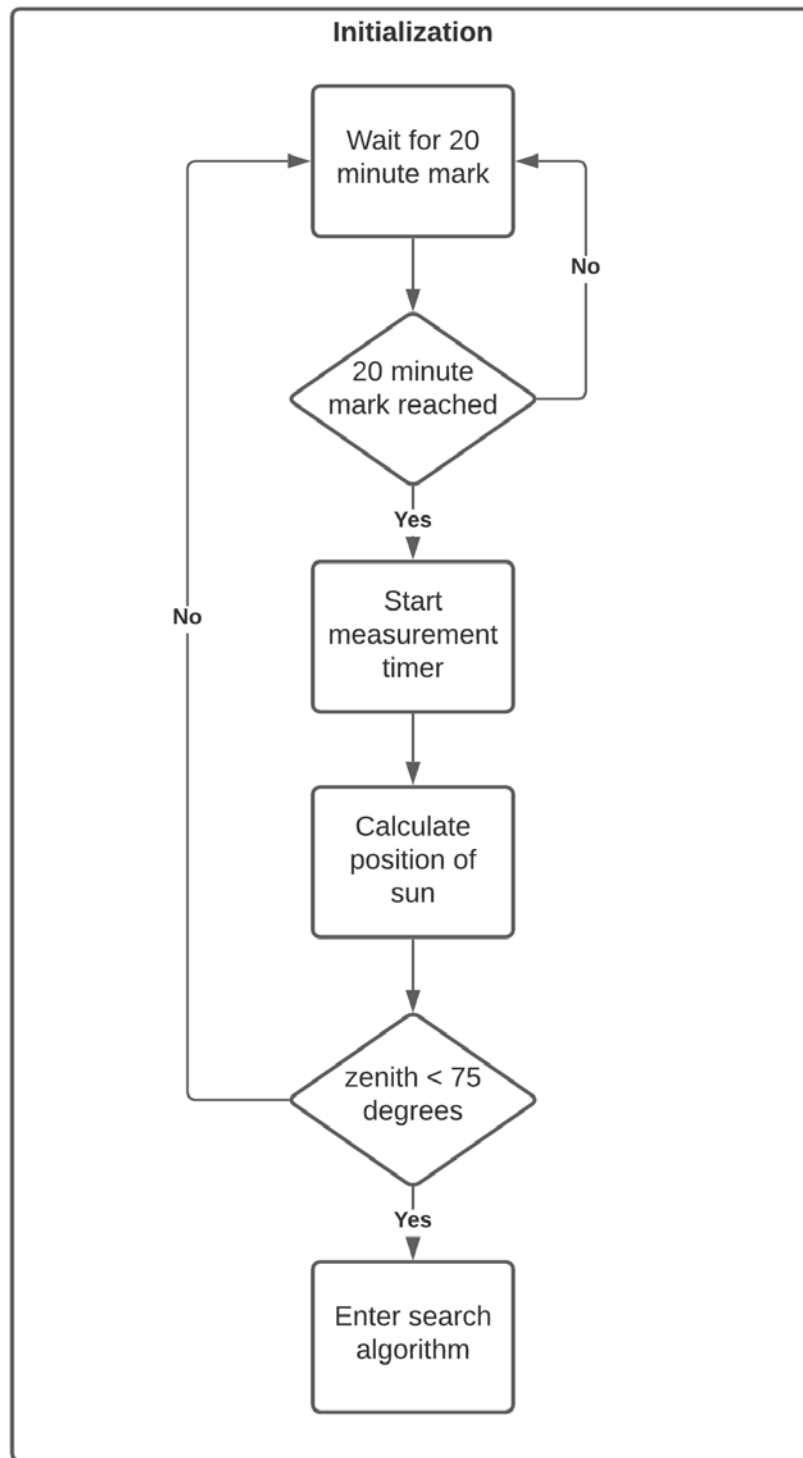

**Figure S3:** AOD subsystem initialization protocol.

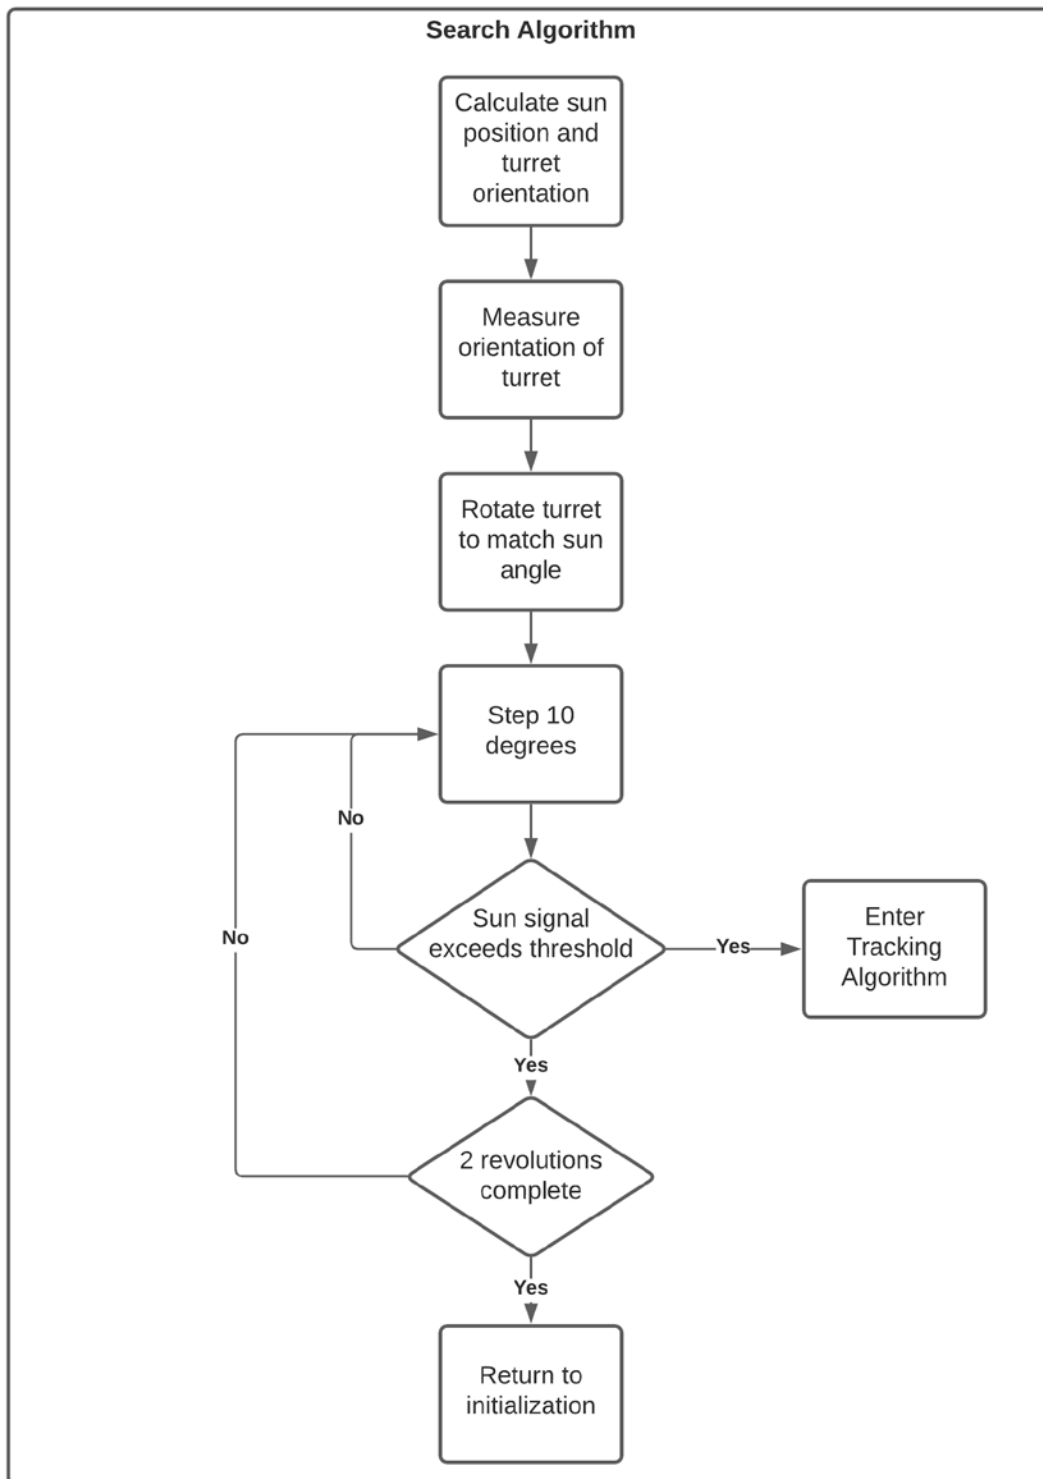

**Figure S4:** AOD subsystem search algorithm.

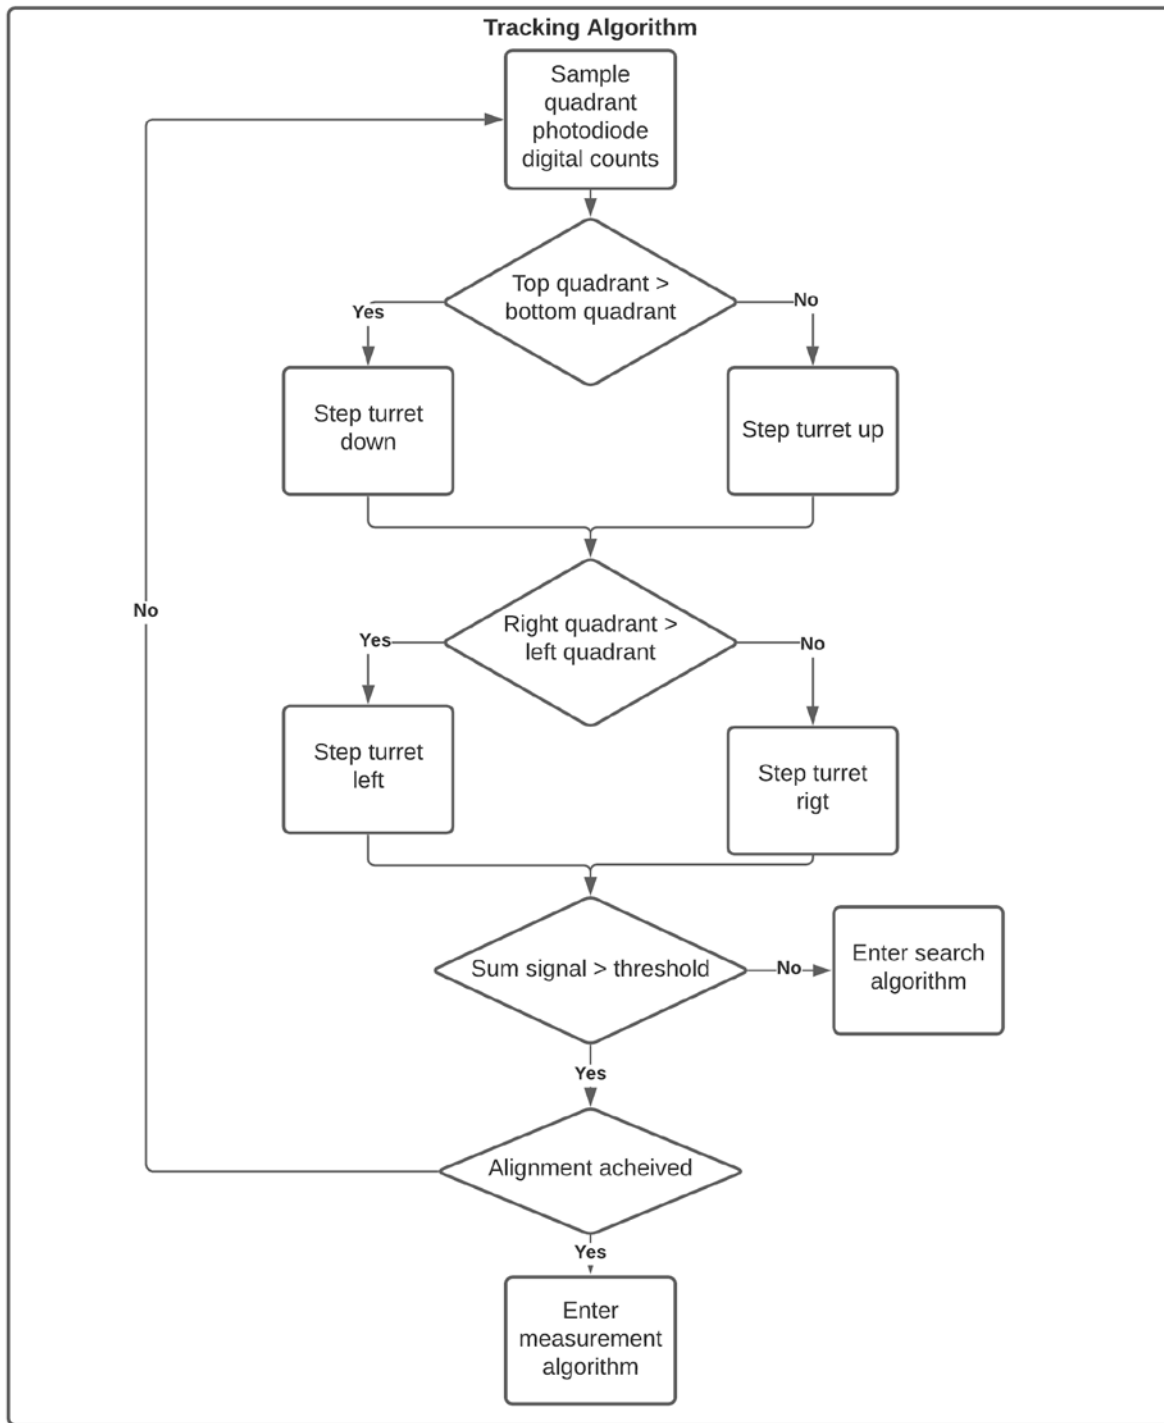

**Figure S5:** AOD subsystem tracking algorithm

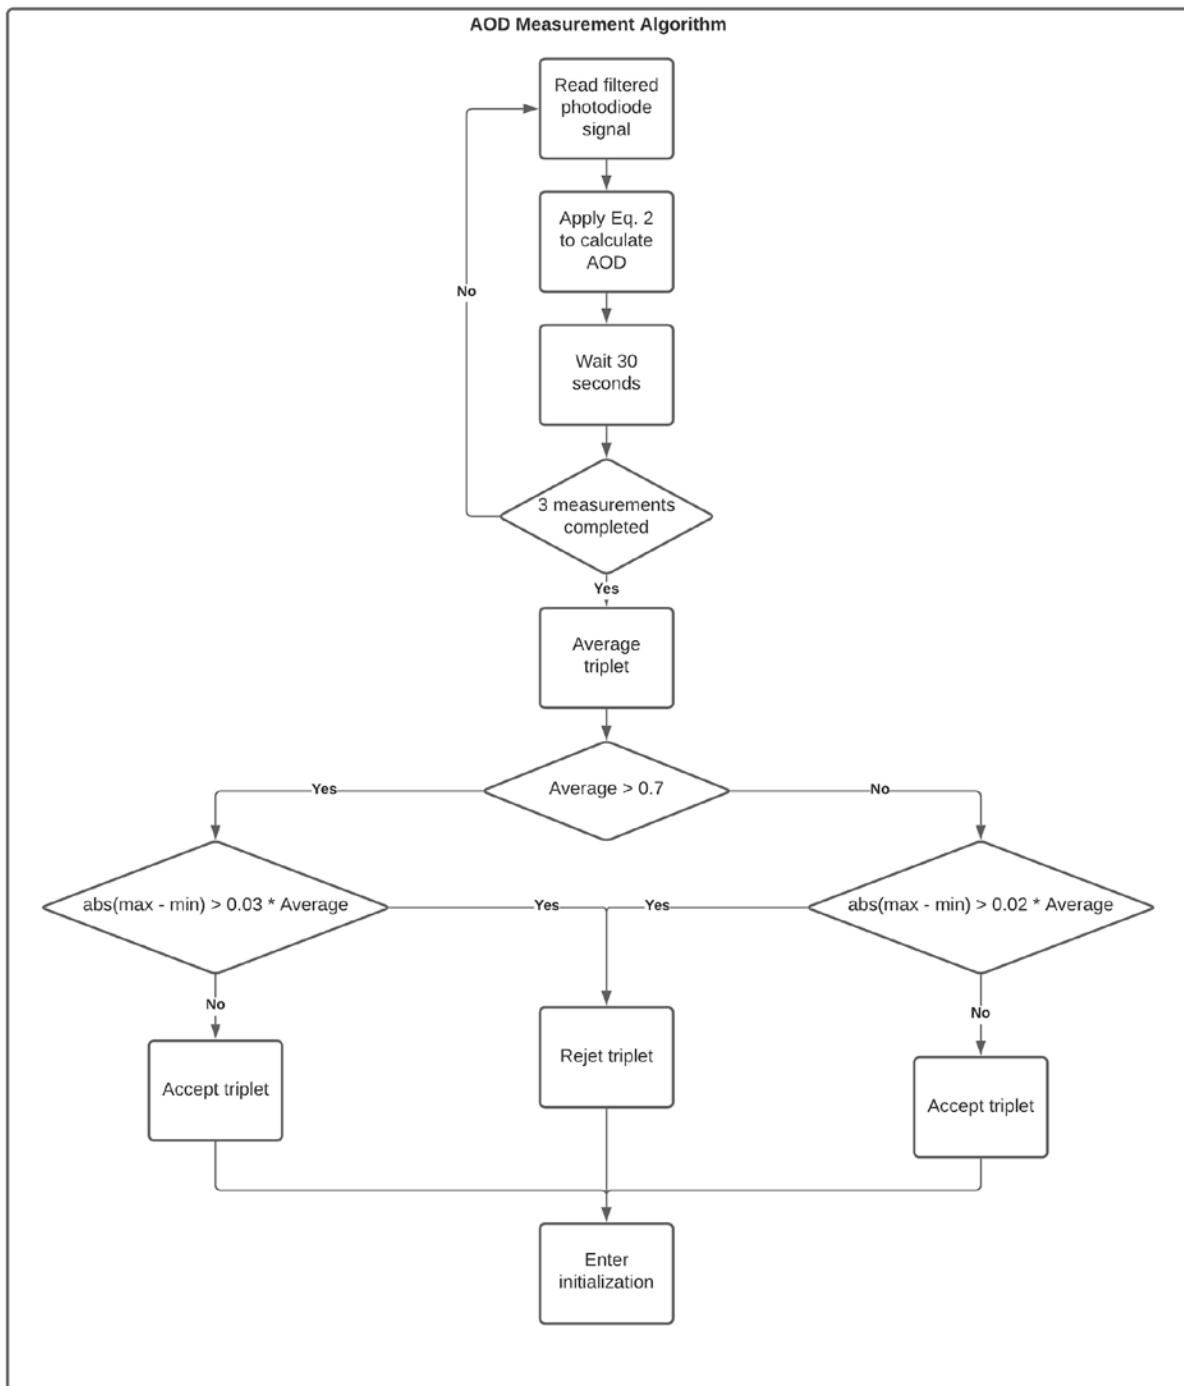

**Figure S6:** AOD subsystem measurement algorithm

**Table S1:** AMODv2 validation summary statistics calculated separately for elevated-AOD days and clear days. Elevated-AOD days were defined as days when the average AERONET AOD at 500 nm was greater than or equal to 0.15. Clear days were defined as days in which the average AOD was less than 0.15. In total, five days were identified as clear and four days were identified as elevated-AOD.

| Wavelength (nm) | AERONET 500 nm<br>AOD magnitude | Number of samples | Mean absolute error<br>(AOD) | AOD Precision<br>(AOD) |
|-----------------|---------------------------------|-------------------|------------------------------|------------------------|
| 440             | All included                    | 426               | 0.04                         | 0.02                   |
| 500             | All included                    | 426               | 0.06                         | 0.02                   |
| 675             | All included                    | 426               | 0.03                         | 0.01                   |
| 870             | All included                    | 426               | 0.03                         | 0.02                   |
| 440             | > 0.15 (elevated)               | 115               | 0.05                         | 0.02                   |
| 500             | > 0.15 (elevated)               | 115               | 0.05                         | 0.02                   |
| 675             | > 0.15 (elevated)               | 115               | 0.03                         | 0.01                   |
| 870             | > 0.15 (elevated)               | 115               | 0.03                         | 0.01                   |
| 440             | < 0.15 (clear)                  | 311               | 0.04                         | 0.02                   |
| 500             | < 0.15 (clear)                  | 311               | 0.06                         | 0.03                   |
| 675             | < 0.15 (clear)                  | 311               | 0.02                         | 0.01                   |
| 870             | < 0.15 (clear)                  | 311               | 0.03                         | 0.02                   |

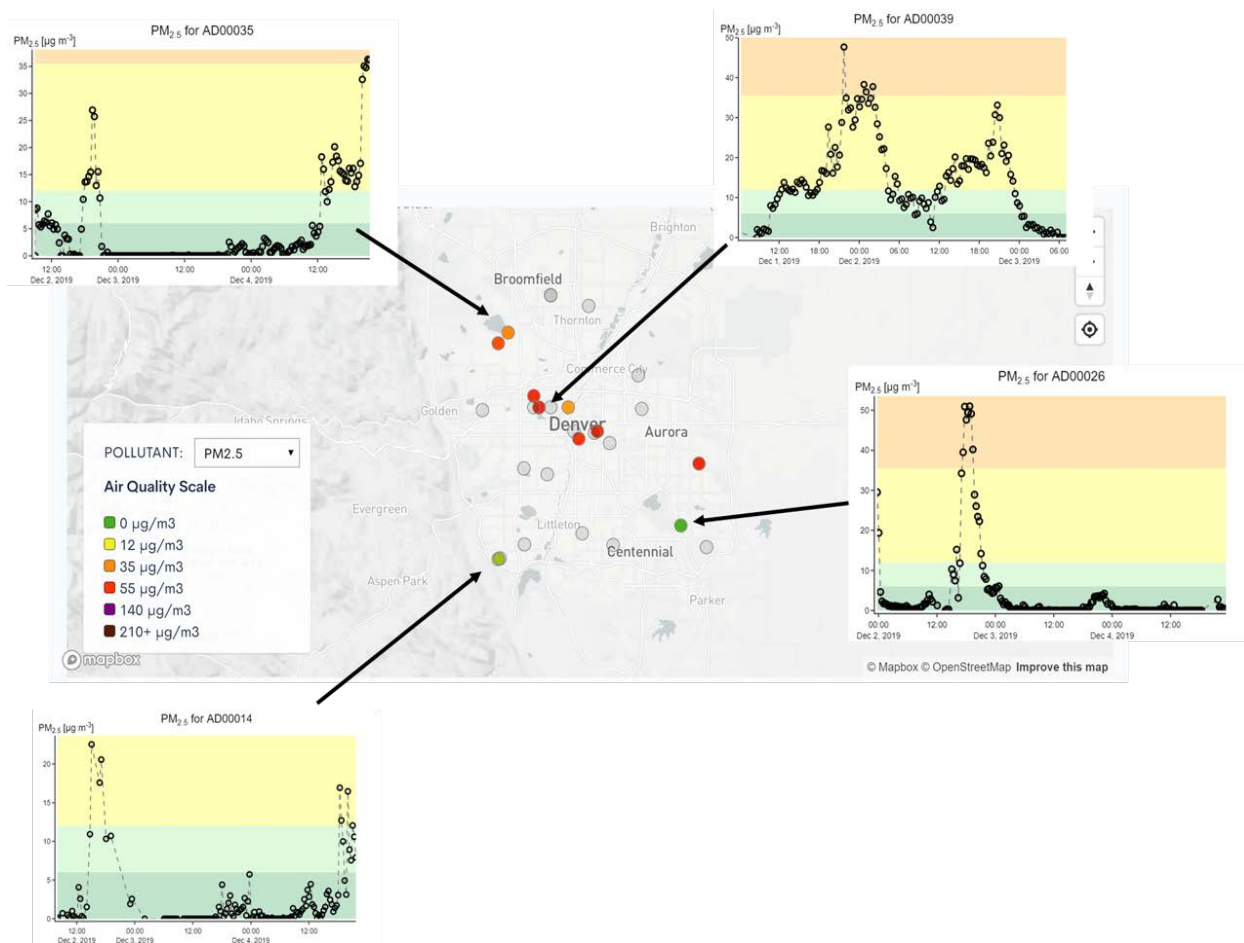

**Figure S7:** Example live map from project website [csu-ceams.com](http://csu-ceams.com) overlaid with time series of  $\text{PM}_{2.5}$  from selected units. This snapshot was taken at a time when AMODv2 units were located at different locations in Colorado for test deployments, for purposes of illustrating the web interface. Colored circles represent active AMODv2s. Grey circles represent inactive AMODv2 units. Inactive units are either charging between samples or have been sent back from the testing site. The color scale is determined by the current Air Quality Index (AQI) calculated based on the  $\text{PM}_{2.5}$  measurement. The four sample  $\text{PM}_{2.5}$  time series plots are linked to specific participant locations with arrows. Time series plots can be accessed by clicking on an active circle. Users may select the option to view AOD from a drop-down menu for both the map and the time series plot. Note: that this figure has been edited to show map and time series plots on the same page. On the actual website selecting a point displays only one simplified time series on the map itself. Detailed time series shown here are available on a separate page which can be accessed through selecting a unit on the map.



Here we present results from a sample deployment of 10 units. We configured the units to sample for approximately 60 hours. The 10 units were co-located and sampled simultaneously. We collected and analysed real-time PM<sub>2.5</sub> mass concentrations, AOD, PM<sub>2.5</sub> to AOD ratio, meteorological data, and quality control data. In Fig. S8, we provide real-time AOD at 500 nm, real-time PM<sub>2.5</sub>, and the corresponding PM<sub>2.5</sub> to AOD ratios.

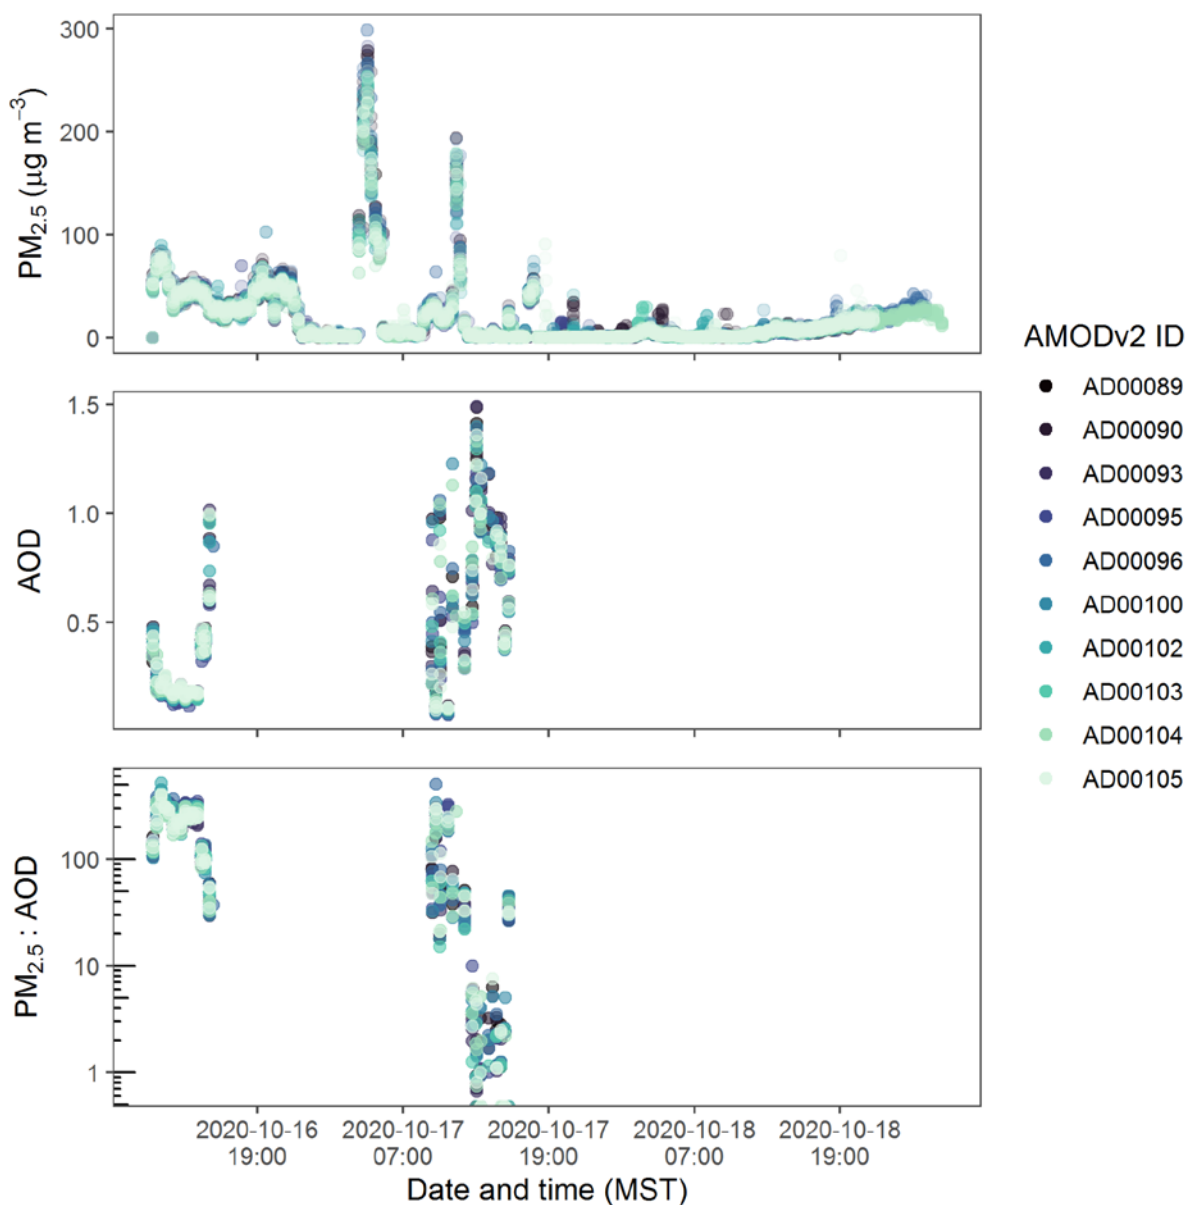

**Figure S8:** Time series from 10 co-located AMODv2s featuring PM<sub>2.5</sub> concentration, AOD at 500 nm, and PM<sub>2.5</sub> to AOD (at 500nm) ratio for 17-19 October 2020 in MST. PM<sub>2.5</sub> measurements are from the Plantower PMS5003 and are the CF = 1 values. These values have not been corrected relative to the filter mass concentrations. Points are colored according to the

AMODv2 ID. Note the vertical axis for PM<sub>2.5</sub>:AOD is provided in a logarithmic scale to clarify lower values indicative of lofted smoke.

In Fig. S9, we provide detailed results from a single unit including 4-channel AOD, PM<sub>2.5</sub>, and meteorological data including temperature, pressure, and relative humidity. This sample deployment highlighted several important strengths of the AMODv2 relative to AMODv1 and other prior sampling approaches. The high temporal resolution of AOD and PM<sub>2.5</sub> measurements facilitated a more complete understanding of the air pollution event occurring during the sample. With the AMODv2, we observed moderate air pollution at the start of the sample on the afternoon of 16 October 2020, with all units reporting consistent values for AOD ( $>0.3 \pm 0.06$ ) and PM<sub>2.5</sub> ( $50 \pm 20.0$  to  $100 \pm 40.0 \mu\text{g m}^{-3}$ ). This was followed by increases on 17 October 2020 to severe levels (AOD up to  $1.5 \pm 0.06$  and PM<sub>2.5</sub> up to  $300 \pm 66.2 \mu\text{g m}^{-3}$ ) as wildfire smoke swept over the city in the afternoon and gradually subsided over the course of 18 October 2020. We observed reductions in PM<sub>2.5</sub>:AOD ( $<10$ ) as ground level PM<sub>2.5</sub> decreased to moderate and mild levels ( $<20 \pm 2.0 \mu\text{g m}^{-3}$ ), while the AOD remained elevated ( $>0.5 \pm 0.06$ ) due to the presence of lofted smoke. We then noted the continuation of the trend at ground level with the further reduction of ground-level PM<sub>2.5</sub> on 19 October 2020 ( $5 \pm 2.0$  to  $15 \pm 2.0 \mu\text{g m}^{-3}$ ). Cloud cover prevented additional AOD measurements on 19<sup>th</sup> October, which was automatically screened for using the cloud screening algorithm. The meteorological data was also consistent with cloud cover with lower temperatures and elevated relative humidity reported on that day (Fig. S9).

Data from the sample deployment were accessed from our companion website (csu-ceams.com) in real time. With AOD, PM<sub>2.5</sub> and PM<sub>2.5</sub>:AOD reported every 20 minutes throughout the sample to the website, we could assess the progress of wildfire smoke in Fort Collins remotely in real time. This was not possible with AMODv1, which lacked wireless transmission capabilities. In terms of scalability, the AMODv2 was relatively easy to deploy and maintain owing to its compact design, coupled with its automated measurement protocols. In the sample test, we were able to quickly prepare and deploy units in response to wildfire activity.

We leveraged the data accessibility features of AMODv2 for real-time quality control of incoming sample data. We monitored sample flow rate and total sampled volume to detect potential errors with the gravimetric sample collection. We monitored battery temperature to detect potential overheating of the unit, allowing proper intervention (e.g. temporarily moving

the unit into shade) before the instrument reaches a shutoff threshold. We used battery voltage, battery state of charge, and current draw data to identify units unlikely to complete the intended sample duration. Current draw data was also used to identify when the tracking motors were engaged, indicating an attempted AOD measurement at the expected time. Wireless signal strength data were used to identify units with relatively poor connection and move them into areas with better signal. In the sample deployment detailed here, no interventions based on quality control data were warranted. However, in general, these data can be used to remotely identify and address malfunctioning units mid-sample. This feature represents a substantial improvement compared with AMODv1, which provided no sample quality control data in real time, requiring manual data acquisition (via micro SD card) and unit inspection following a failed sample.

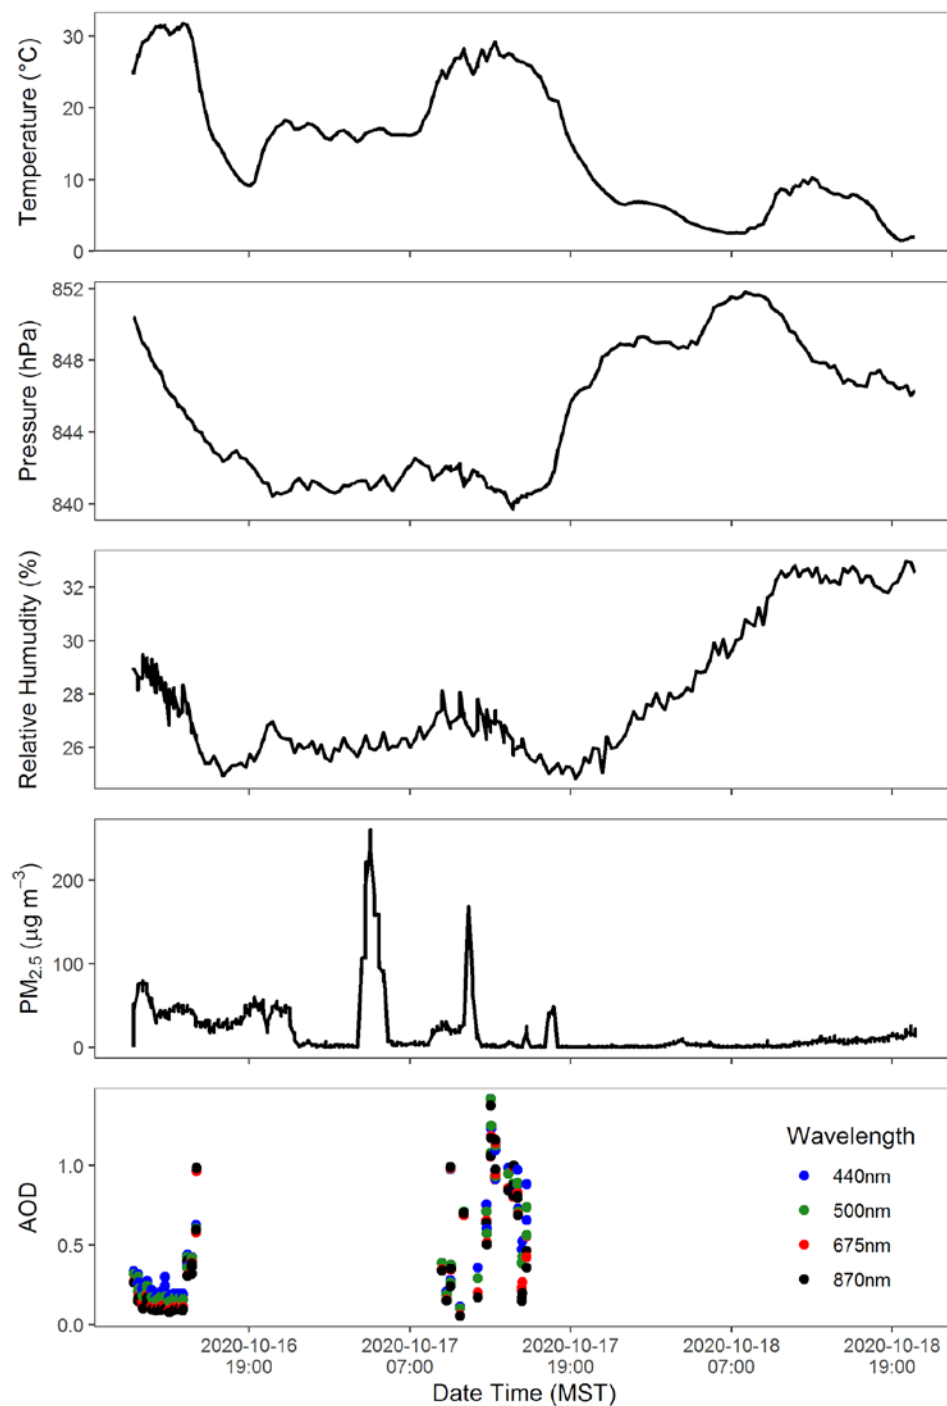

**Figure S9:** Sample time series from completed AMODv2 sample in MST. Temperature, pressure, relative humidity, and PM<sub>2.5</sub> reported at 30 second intervals are provided in the top four panels. The bottom panel gives screened AOD measurements, reported at 20 minute intervals. The presence of wildfire smoke on October 17 corresponded with increases in PM<sub>2.5</sub> and AOD.

**Table S2: AMODv2 Cost of Goods and Assembly Summary. Costs tabulated here are for a production run of 100 units.**

| Component                                 | Manufacturer            | Part Number         | Cost  |
|-------------------------------------------|-------------------------|---------------------|-------|
| Printed Circuit Boards                    | Vergent Engineering     | Custom Parts        | \$400 |
| 440 nm Filtered Photodiode                | Intor                   | Custom Parts        | \$28  |
| 520 nm Filtered Photodiode                | Intor                   | Custom Parts        | \$26  |
| 680 nm Filtered Photodiode                | Intor                   | Custom Parts        | \$26  |
| 870 nm Filtered Photodiode                | Intor                   | Custom Parts        | \$28  |
| Light-Scattering PM <sub>2.5</sub> Sensor | Plantower               | PMS5003             | \$15  |
| Solar Alignment Sensor                    | Solar MEMS              | NANO-ISS5           | \$45  |
| Electrical Box                            | Polycase                | Custom Part         | \$55  |
| 3D Printed Fixtures                       | GoProto                 | Custom Part         | \$67  |
| Cyclone and Inlet                         | Synergy Core            | Custom Part         | \$74  |
| Battery Pack                              | Dakota LithiumBatteries | 12V 10AH<br>LiFePO4 | \$63  |
| Auxiliary Battery Pack                    | Battery Space           | LFH4S4R1WR-C5       | \$68  |
| Zenith Stepper Motor                      | Stepper Online          | 17HS10-0704S-C2     | \$7   |
| Azimuth Stepper Motor                     | Stepper Online          | 17HS19-1684S-C6     | \$8   |
| Misc. Housing Components                  | N/A                     | N/A                 | \$25  |

|                |     |     |        |
|----------------|-----|-----|--------|
| Assembly Labor | N/A | N/A | \$240  |
| Total Costs    |     |     | \$1175 |
